# Supplementary material
Source: MDPI journal article supplement (https://www.mdpi.com/2311-5521/5/4/197)
Supplement: s1 [file s1]

Archive with 2 entries (2 files):
- si.pdf
- si_experimental_data.xlsx
