# Supplementary material
Source: MDPI journal article supplement (https://www.mdpi.com/2311-5521/5/4/197)
Supplement: s1 [file s1 › si_experimental_data.xlsx]

## Sheet: noslip_water_1
Geometry
Cell gap		0.0127	m
Rotor wetted length		0.0762	m
Rotor radius		0.0381	m
Working Fluid
Description		Deionized water
Density		997.5	kg / m3
Viscosity		0.000932	Pa s
Rheometer data
Speed	Torque	Shear stress	Re*	Cf	√ 2 / Cf	Re
rad/s	μN m	Pa	[-]	[-]	[-]	[-]
25.12	1515.1	2.18	635.437	0.00477182	20.4726	13009
28.18	1820.2	2.61899	696.484	0.00455533	20.9534	14593.7
31.62	2192.1	3.1541	764.332	0.00435732	21.4242	16375.2
35.48	2644.6	3.80518	839.522	0.00417518	21.8866	18374.2
39.81	3186.9	4.58547	921.586	0.00399638	22.3708	20616.6
44.67	3850.3	5.54	1012.98	0.00383482	22.8372	23133.5
50.12	4650.9	6.69194	1113.32	0.00367957	23.314	25955.9
56.23	5620.7	8.08734	1223.9	0.00353294	23.7929	29120.2
63.1	6809.6	9.79799	1347.14	0.00339895	24.2573	32678
70.79	8248.3	11.8681	1482.63	0.00327117	24.7265	36660.4
79.43	10016	14.4115	1633.8	0.00315506	25.1774	41134.9
89.13	12187	17.5353	1802.19	0.00304882	25.6123	46158.3
100	14817	21.3194	1987.16	0.00294471	26.0612	51787.6

## Sheet: noslip_water_2
Geometry
Cell gap		0.0127	m
Rotor wetted length		0.0762	m
Rotor radius		0.0381	m
Working Fluid
Description		Deionized water
Density		997.5	kg / m3
Viscosity		0.000932	Pa s
Rheometer data
Speed	Torque	Shear stress	Re*	Cf	√ 2 / Cf	Re
rad/s	μN m	Pa	[-]	[-]	[-]	[-]
25.12	1472	2.11799	626.334	0.00463608	20.7701	13009
28.18	1793.2	2.58014	691.299	0.00448775	21.1106	14593.7
31.62	2157.4	3.10417	758.258	0.00428834	21.5959	16375.2
35.48	2601.6	3.74331	832.668	0.00410729	22.0667	18374.2
39.81	3146.6	4.52748	915.741	0.00394584	22.5136	20616.6
44.67	3800.2	5.46791	1006.36	0.00378492	22.9872	23133.5
50.12	4599.4	6.61784	1107.14	0.00363883	23.4441	25955.9
56.23	5576.1	8.02317	1219.04	0.00350491	23.8878	29120.2
63.1	6780.8	9.75655	1344.29	0.00338458	24.3088	32678
70.79	8241.7	11.8586	1482.04	0.00326855	24.7364	36660.4
79.43	10011	14.4043	1633.39	0.00315348	25.1837	41134.9
89.13	12169	17.5094	1800.86	0.00304431	25.6313	46158.3
100	14843	21.3568	1988.9	0.00294988	26.0383	51787.6

## Sheet: noslip_pam10_1
Geometry
Cell gap		0.0127	m
Rotor wetted length		0.0762	m
Rotor radius		0.0381	m
Working Fluid
Description		Water + PAM (10 ppm)
Density		997.5	kg / m3
Viscosity		0.000947	Pa s
Rheometer data
Speed	Torque	Shear stress	Re*	Cf	√ 2 / Cf
rad/s	μN m	Pa	[-]	[-]	[-]
44.03	3669.9	5.28043	973.296	0.00376218	23.0566
47.55	4130.4	5.94302	1032.56	0.00363056	23.4708
51.34	4647.2	6.68662	1095.25	0.00350398	23.891
55.44	5226.9	7.52072	1161.56	0.00337972	24.3262
59.86	5879.8	8.46014	1231.97	0.00326116	24.7645
64.63	6617.3	9.5213	1306.95	0.00314844	25.2039
69.79	7451.2	10.7212	1386.85	0.00304034	25.648
75.36	8387.5	12.0683	1471.41	0.00293517	26.1035
81.37	9450.2	13.5974	1561.85	0.00283658	26.5532
87.86	10633	15.2993	1656.71	0.00273751	27.0294
94.87	12024	17.3007	1761.74	0.00265505	27.4459
100	13068	18.8029	1836.63	0.00259712	27.7504

## Sheet: noslip_pam10_2
Geometry
Cell gap		0.0127	m
Rotor wetted length		0.0762	m
Rotor radius		0.0381	m
Working Fluid
Description		Water + PAM (10 ppm)
Density		997.5	kg / m3
Viscosity		0.000947	Pa s
Rheometer data
Speed	Torque	Shear stress	Re*	Cf	√ 2 / Cf
rad/s	μN m	Pa	[-]	[-]	[-]
44.03	3643.3	5.24216	969.762	0.00373491	23.1406
47.55	4101.3	5.90115	1028.91	0.00360498	23.5539
51.34	4617.6	6.64403	1091.76	0.00348166	23.9674
55.44	5196.5	7.47698	1158.17	0.00336006	24.3973
59.86	5850.1	8.41741	1228.85	0.00324468	24.8273
64.63	6583.2	9.47223	1303.58	0.00313221	25.2691
69.79	7409.6	10.6613	1382.98	0.00302337	25.7199
75.36	8352.6	12.0181	1468.35	0.00292296	26.158
81.37	9402.7	13.5291	1557.92	0.00282232	26.6202
87.86	10617	15.2763	1655.46	0.00273339	27.0498
94.87	11965	17.2158	1757.41	0.00264203	27.5135
100	13035	18.7554	1834.31	0.00259056	27.7855

## Sheet: noslip_pam25_1
Geometry
Cell gap		0.0127	m
Rotor wetted length		0.0762	m
Rotor radius		0.0381	m
Working Fluid
Description		Water + PAM (25 ppm)
Density		997.5	kg / m3
Viscosity		0.000957	Pa s
Rheometer data
Speed	Torque	Shear stress	Re*	Cf	√ 2 / Cf
rad/s	μN m	Pa	[-]	[-]	[-]
40.78	3178.5	4.57338	896.328	0.00379848	22.9462
44.03	3572	5.13957	950.192	0.00366182	23.3704
47.55	4014.6	5.7764	1007.34	0.00352877	23.8069
51.34	4508.7	6.48734	1067.53	0.00339955	24.2552
55.44	5067.7	7.29165	1131.78	0.00327678	24.7054
59.86	5690.5	8.18777	1199.31	0.00315616	25.173
64.63	6395.5	9.20216	1271.43	0.00304291	25.6372
69.79	7187.3	10.3414	1347.84	0.00293266	26.1146
75.36	8079.8	11.6256	1429.08	0.00282749	26.5959
81.37	9088.1	13.0764	1515.63	0.00272789	27.0771
87.86	10240	14.7338	1608.81	0.00263633	27.5432
94.87	11510	16.5612	1705.66	0.00254156	28.0521
100	12536	18.0374	1780.06	0.00249139	28.3331

## Sheet: noslip_pam25_2
Geometry
Cell gap		0.0127	m
Rotor wetted length		0.0762	m
Rotor radius		0.0381	m
Working Fluid
Description		Water + PAM (25 ppm)
Density		997.5	kg / m3
Viscosity		0.000963	Pa s
Rheometer data
Speed	Torque	Shear stress	Re*	Cf	√ 2 / Cf
rad/s	μN m	Pa	[-]	[-]	[-]
40.78	3161.1	4.54835	888.302	0.00377769	23.0092
44.03	3554.9	5.11496	942.009	0.00364429	23.4266
47.55	3992.5	5.7446	998.307	0.00350935	23.8727
51.34	4485.5	6.45396	1058.15	0.00338206	24.3178
55.44	5041.1	7.25338	1121.77	0.00325958	24.7705
59.86	5664.9	8.15094	1189.15	0.00314196	25.2298
64.63	6368	9.16259	1260.79	0.00302982	25.6925
69.79	7161.5	10.3043	1337.04	0.00292213	26.1616
75.36	8054.9	11.5898	1417.98	0.00281878	26.637
81.37	9056.2	13.0305	1503.54	0.00271831	27.1247
87.86	10180	14.6475	1594.1	0.00262088	27.6243
94.87	11503	16.5511	1694.52	0.00254001	28.0606
100	12495	17.9784	1766.08	0.00248324	28.3796

## Sheet: noslip_pam50_1
Geometry
Cell gap		0.0127	m
Rotor wetted length		0.0762	m
Rotor radius		0.0381	m
Working Fluid
Description		Water + PAM (50 ppm)
Density		997.5	kg / m3
Viscosity		0.000978	Pa s
Rheometer data
Speed	Torque	Shear stress	Re*	Cf	√ 2 / Cf
rad/s	μN m	Pa	[-]	[-]	[-]
40.78	3122.9	4.49338	869.377	0.00373204	23.1495
44.03	3509	5.04892	921.554	0.00359723	23.5793
47.55	3939.7	5.66863	976.474	0.00346294	24.0322
51.34	4421.8	6.3623	1034.5	0.00333403	24.4923
55.44	4968	7.1482	1096.53	0.00321231	24.9521
59.86	5579.6	8.0282	1162.07	0.00309465	25.422
64.63	6265.9	9.01568	1231.46	0.00298124	25.901
69.79	7037.7	10.1262	1305.1	0.00287162	26.3907
75.36	7910.9	11.3826	1383.7	0.00276838	26.8783
81.37	8885.9	12.7855	1466.49	0.0026672	27.3834
87.86	10000	14.3885	1555.71	0.00257454	27.8718
94.87	11248	16.1842	1649.93	0.0024837	28.3769
100	12229	17.5957	1720.38	0.00243038	28.6866

## Sheet: noslip_pam50_2
Geometry
Cell gap		0.0127	m
Rotor wetted length		0.0762	m
Rotor radius		0.0381	m
Working Fluid
Description		Water + PAM (50 ppm)
Density		997.5	kg / m3
Viscosity		0.000968	Pa s
Rheometer data
Speed	Torque	Shear stress	Re*	Cf	√ 2 / Cf
rad/s	μN m	Pa	[-]	[-]	[-]
40.78	3084.4	4.43799	872.927	0.00368603	23.2936
44.03	3460.7	4.97942	924.644	0.00354772	23.7433
47.55	3886.6	5.59223	979.89	0.00341626	24.1958
51.34	4364.8	6.28029	1038.42	0.00329105	24.6517
55.44	4901.2	7.05209	1100.38	0.00316912	25.1215
59.86	5508	7.92518	1166.51	0.00305494	25.5867
64.63	6188	8.9036	1236.42	0.00294418	26.0635
69.79	6956.5	10.0094	1310.96	0.00283849	26.5443
75.36	7824.5	11.2583	1390.34	0.00273815	27.0263
81.37	8811.8	12.6788	1475.45	0.00264496	27.4983
87.86	9915.2	14.2665	1565.1	0.00255271	27.9907
94.87	11103	15.9755	1656.2	0.00245169	28.5616
100	12104	17.4158	1729.25	0.00240553	28.8343

## Sheet: noslip_pam100_1
Geometry
Cell gap		0.0127	m
Rotor wetted length		0.0762	m
Rotor radius		0.0381	m
Working Fluid
Description		Water + PAM (100 ppm)
Density		997.5	kg / m3
Viscosity		0.00101	Pa s
Rheometer data
Speed	Torque	Shear stress	Re*	Cf	√ 2 / Cf
rad/s	μN m	Pa	[-]	[-]	[-]
40.78	3099.8	4.46014	838.713	0.00370443	23.2356
44.03	3476.5	5.00216	888.214	0.00356391	23.6893
47.55	3905.2	5.61899	941.387	0.00343261	24.1381
51.34	4382.6	6.3059	997.269	0.00330447	24.6016
55.44	4921.6	7.08144	1056.82	0.00318231	25.0694
59.86	5524.4	7.94878	1119.67	0.00306404	25.5487
64.63	6210	8.93525	1187.11	0.00295465	26.0173
69.79	6970.7	10.0298	1257.72	0.00284428	26.5173
75.36	7824.9	11.2588	1332.56	0.00273829	27.0256
81.37	8781.4	12.6351	1411.65	0.00263583	27.5459
87.86	9887.3	14.2263	1497.91	0.00254553	28.0302
94.87	11137	16.0245	1589.76	0.00245919	28.518
100	12091	17.3971	1656.45	0.00240295	28.8498

## Sheet: noslip_pam100_2
Geometry
Cell gap		0.0127	m
Rotor wetted length		0.0762	m
Rotor radius		0.0381	m
Working Fluid
Description		Water + PAM (100 ppm)
Density		997.5	kg / m3
Viscosity		0.000998	Pa s
Rheometer data
Speed	Torque	Shear stress	Re*	Cf	√ 2 / Cf
rad/s	μN m	Pa	[-]	[-]	[-]
40.78	3061.5	4.40504	843.537	0.00365866	23.3805
44.03	3438.6	4.94763	893.981	0.00352506	23.8194
47.55	3861.5	5.55612	947.36	0.0033942	24.2743
51.34	4338.6	6.24259	1004.18	0.0032713	24.7261
55.44	4870.2	7.00748	1063.92	0.00314907	25.2013
59.86	5474.8	7.87741	1128.03	0.00303653	25.6641
64.63	6148.9	8.84734	1195.46	0.00292558	26.1462
69.79	6912.9	9.94662	1267.56	0.0028207	26.6279
75.36	7779.1	11.1929	1344.63	0.00272226	27.105
81.37	8743.2	12.5801	1425.52	0.00262436	27.606
87.86	9823.4	14.1344	1511.01	0.00252908	28.1212
94.87	11061	15.9151	1603.37	0.00244241	28.6158
100	12018	17.2921	1671.3	0.00238844	28.9373

[truncated: 29 more sheets: noslip_pam200_1, noslip_pam200_2, grooves_water_1, grooves_water_2, grooves_water_3, grooves_water_4, grooves_water_5, grooves_water_6, grooves_water_7, grooves_water_8, grooves_water_9, grooves_water_10, grooves_pam10_1, grooves_pam10_2, grooves_pam10_3, grooves_pam25_1, grooves_pam25_2, grooves_pam25_3, grooves_pam50_1, grooves_pam50_2 …]
